# Supplementary material for: Biomimetic Growth of Hydroxyapatite in Hybrid Polycaprolactone/Graphene Oxide Ultra-Porous Scaffolds
Source: PubMed Central journal article supplement — ACS Omega. 2023 Feb 15;8(8):7904–12. doi: 10.1021/acsomega.2c07656 (PMC9979323; doi:10.1021/acsomega.2c07656), 2023-02-15
Supplement: ao2c07656_si_001.pdf [file ao2c07656_si_001.pdf]

## SUPPLEMENTARY INFORMATION

### Biomimetic growth of hydroxyapatite in hybrid polycaprolactone/graphene oxide ultra-porous scaffolds

S. Fuster-Gómez<sup>1</sup>, I. Castilla Cortázar<sup>1</sup>, A. Vidaurre<sup>1,2</sup>, A.J. Campillo-Fernández<sup>1\*</sup>

<sup>1</sup>Centre for Biomaterials and Tissue Engineering, CBIT, Universitat Politècnica de València, 46022 València, Spain

<sup>2</sup>CIBER de Bioingeniería, Biomateriales y Nanomedicina, Instituto de Salud Carlos III

\* Corresponding author: Tel.: +34 963877000 (ext. 88929); E-mail address: [alcamfer@ter.upv.es](mailto:alcamfer@ter.upv.es) (Alberto J. Campillo)

---

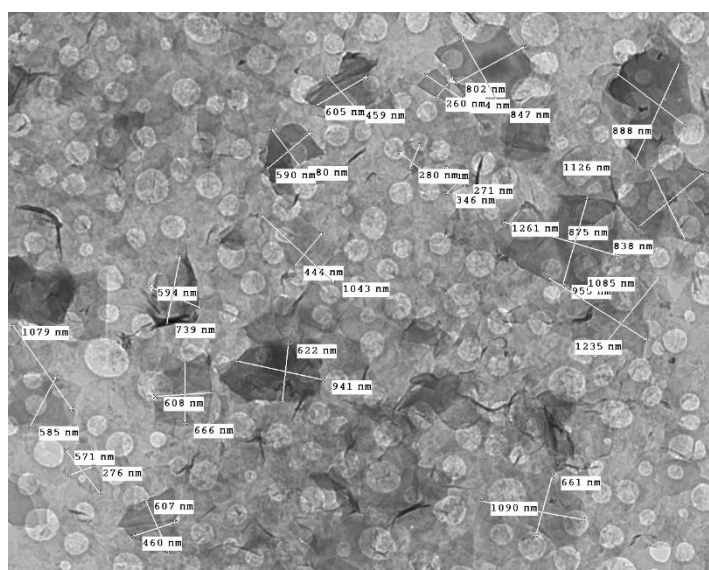

Figure S1. TEM image of the GO after ultrasonication.

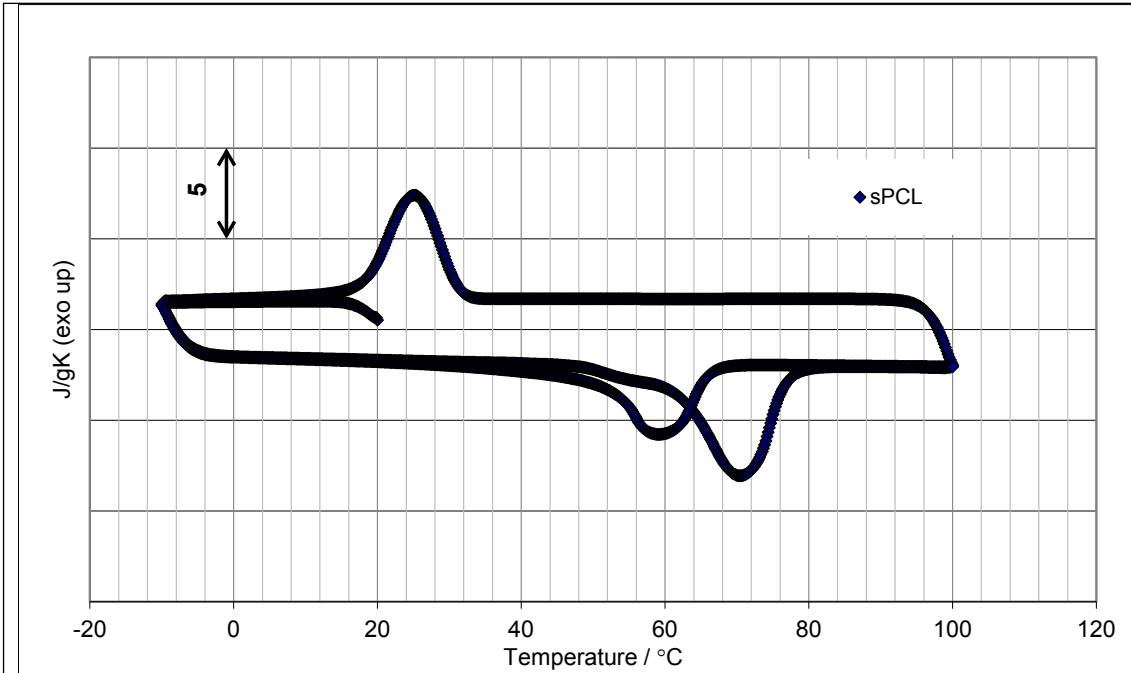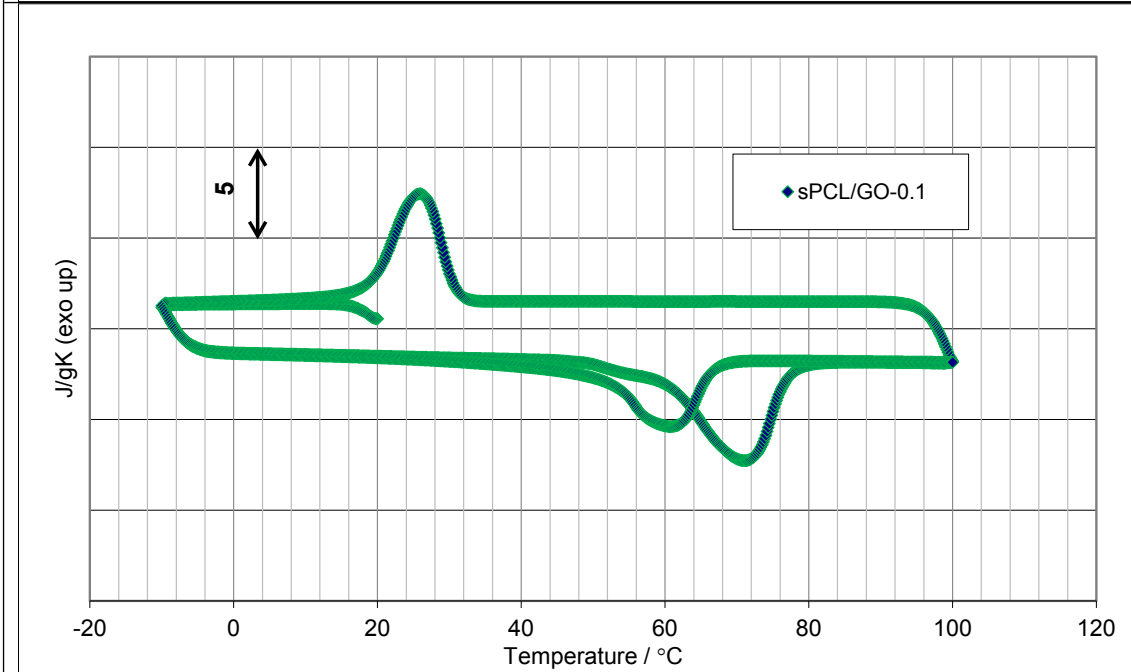

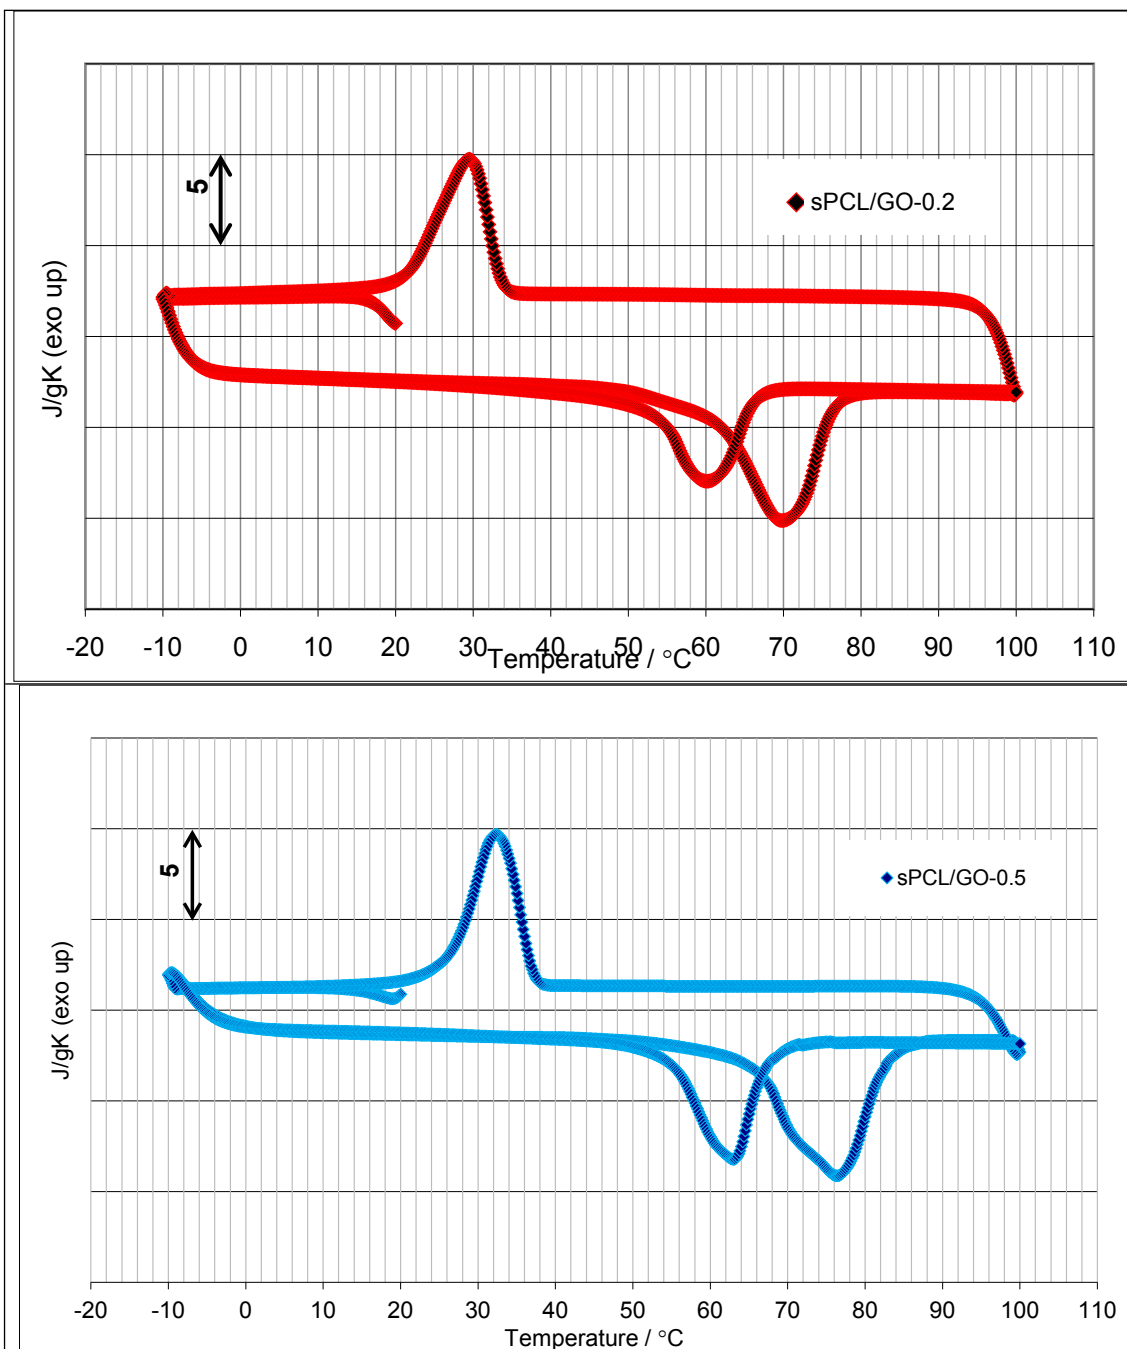

Figure S2. DSC thermograms as a function of GO content.

### SPCL

| Element | Wt%   | Wt% Sigma | Atomic % |
|---------|-------|-----------|----------|
| O       | 28,93 | 0,85      | 47,7     |
| Na      | 1,22  | 0,2       | 1,4      |
| Mg      | 2,77  | 0,24      | 3        |
| P       | 19,45 | 0,6       | 16,56    |
| Ca      | 47,63 | 0,89      | 31,34    |
| Total:  | 100   |           | 100      |

**Ca/P** **1,89**

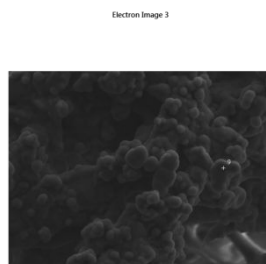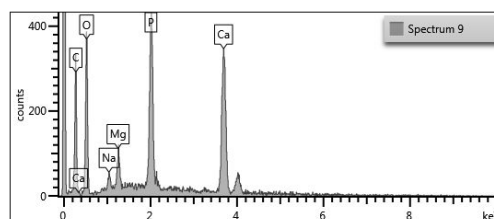

### SPCL/GO-0.1

| Element | Wt%   | Wt% Sigma | Atomic % |
|---------|-------|-----------|----------|
| O       | 29,98 | 0,94      | 48,96    |
| Na      | 0,9   | 0,21      | 1,02     |
| Mg      | 2,76  | 0,27      | 2,97     |
| P       | 19,4  | 0,65      | 16,36    |
| Cl      | 0,96  | 0,26      | 0,71     |
| Ca      | 46    | 0,98      | 29,98    |
| Total:  | 100   |           | 100      |

**Ca/P** **1,83**

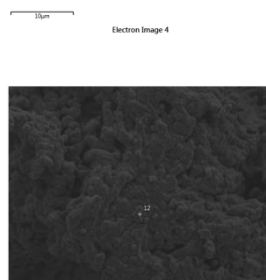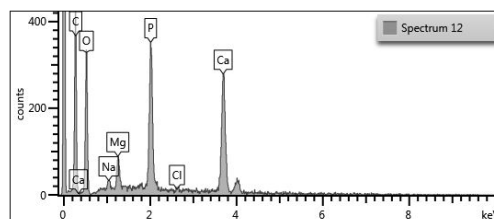

### SPCL/GO-0.2

| Element | Wt%   | Wt% Sigma | Atomic % |
|---------|-------|-----------|----------|
| O       | 59,39 | 0,97      | 76,35    |
| Na      | 1,22  | 0,3       | 1,09     |
| Mg      | 2,15  | 0,29      | 1,82     |
| P       | 10,82 | 0,54      | 7,18     |
| Ca      | 26,43 | 0,91      | 13,56    |
| Total:  | 100   |           | 100      |

**Ca/P** **1,89**

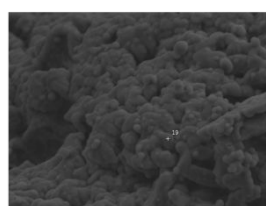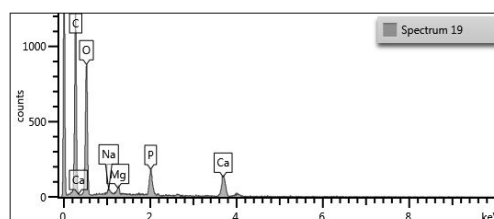

### SPCL/GO-0.5

| Element | Wt%   | Wt% Sigma | Atomic % |
|---------|-------|-----------|----------|
| O       | 39,51 | 1,44      | 59,01    |
| Na      | 1,54  | 0,39      | 1,6      |
| Mg      | 2,98  | 0,4       | 2,93     |
| P       | 17,66 | 0,94      | 13,63    |
| Ca      | 38,31 | 1,43      | 22,84    |
| Total:  | 100   |           | 100      |

**Ca/P** **1,68**

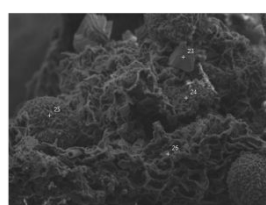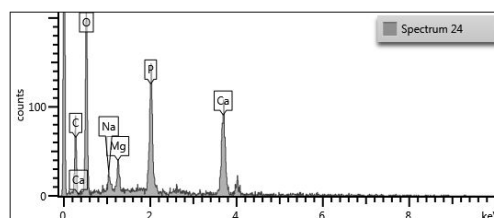

Figure S3. EDX as a function of GO content.
